# Supplementary material for: Fabrication of an Ag/Ag2MoO4plasmonic photocatalyst with enhanced photocatalytic performance for the degradation of ciprofloxacin
Source: Royal Society of Chemistry journal article supplement (doi:10.1039/c8nj02327a), 2018-01-01
Supplement: c8nj02327a1.pdf [file c8nj02327a1.pdf]

## Fabrication of Ag/Ag<sub>2</sub>MoO<sub>4</sub> plasmonic photocatalyst with enhanced photocatalytic performance for degradation of ciprofloxacin

Jin Li,<sup>a</sup> Feng Liu,<sup>a</sup> Yuanrui Li<sup>b</sup>

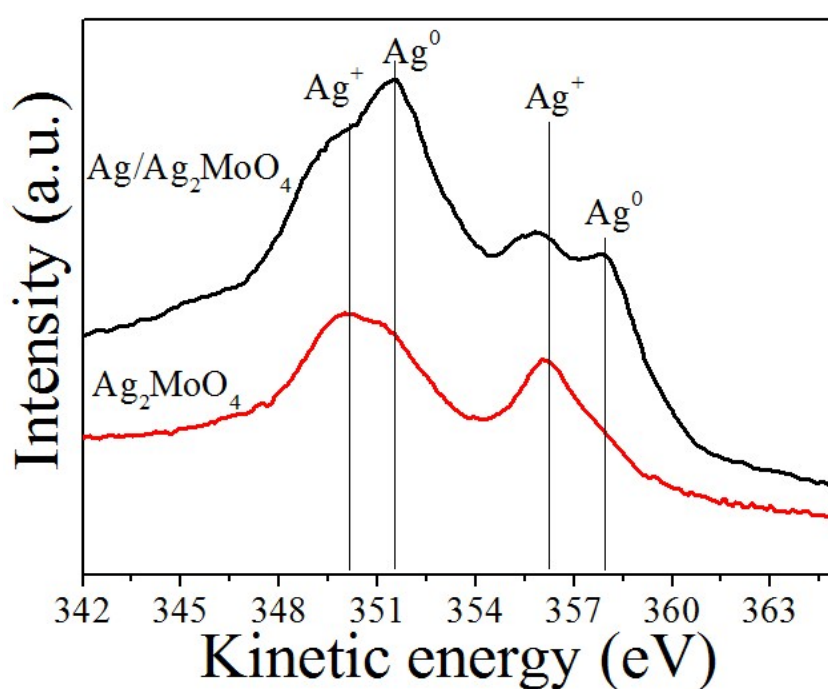

Figure S1. MNN Auger electron spectra of Ag<sub>2</sub>MoO<sub>4</sub> and Ag/Ag<sub>2</sub>MoO<sub>4</sub> samples

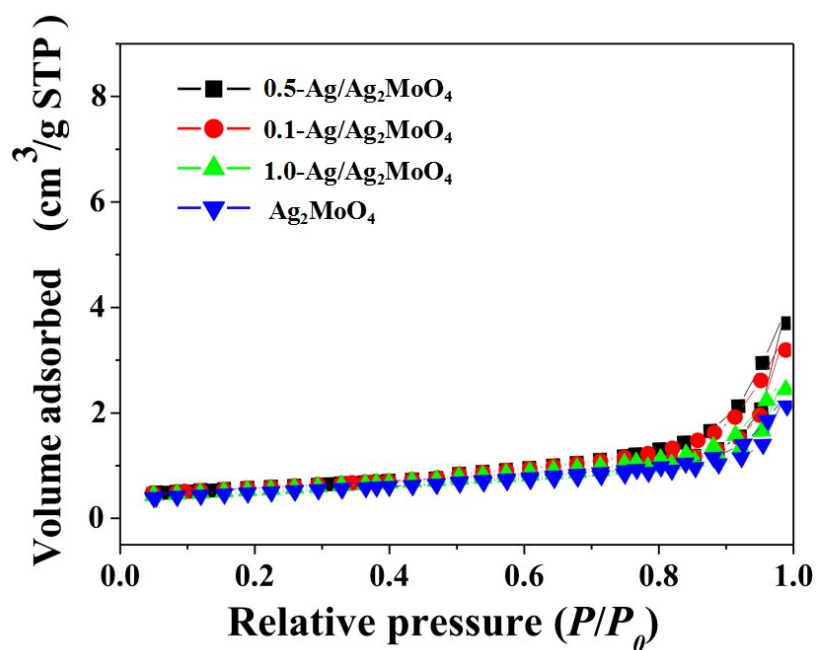

Figure S2. N<sub>2</sub> adsorption-desorption isotherms of Ag<sub>2</sub>MoO<sub>4</sub>, 0.1-Ag/Ag<sub>2</sub>MoO<sub>4</sub>, 0.5-Ag/Ag<sub>2</sub>MoO<sub>4</sub> and 1.0-Ag/Ag<sub>2</sub>MoO<sub>4</sub> samples.

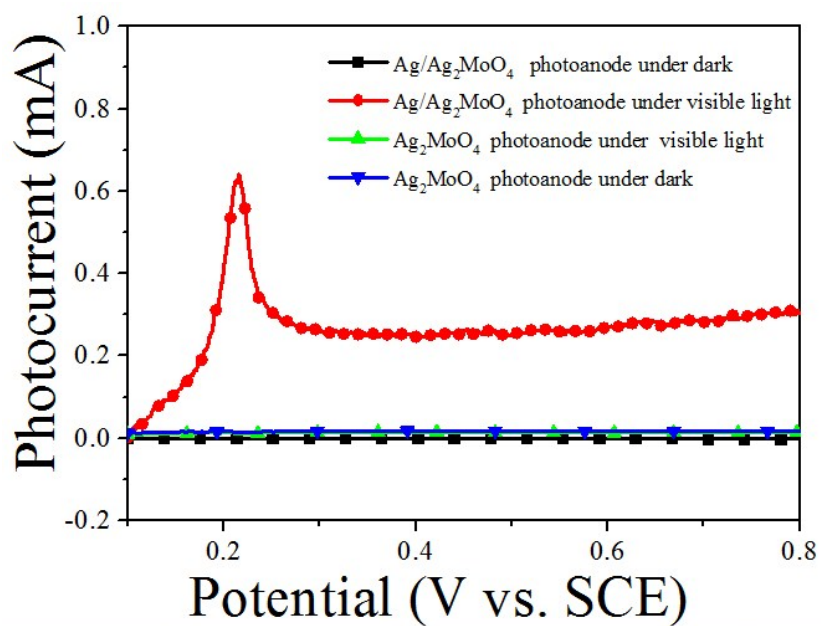

Figure S3. The photocurrent changes at the Ag<sub>2</sub>MoO<sub>4</sub> and Ag/Ag<sub>2</sub>MoO<sub>4</sub> photoanodes in N<sub>2</sub>-saturated 0.1 M Na<sub>2</sub>SO<sub>4</sub> aqueous solutions under the specified conditions.

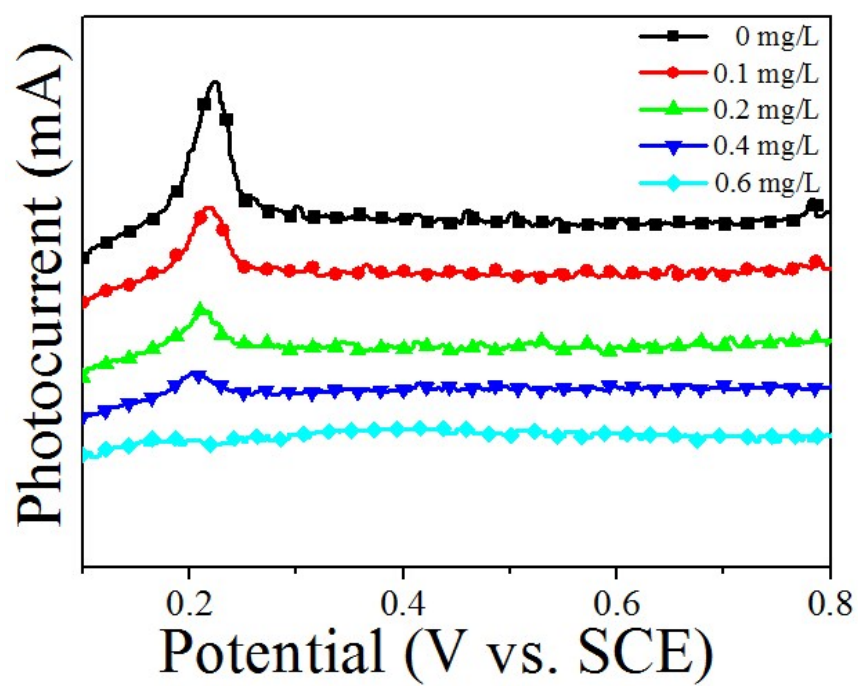

Figure S4. The photocurrent change at the Ag/Ag<sub>2</sub>MoO<sub>4</sub> photoanode with addition of CIP in N<sub>2</sub>-saturated 0.1 M Na<sub>2</sub>SO<sub>4</sub> solution.
